# Supplementary material for: Pathways between Risk/Protective Factors and Maternal Postnatal Depressive Symptoms: The ELFE Cohort
Source: MDPI journal article supplement (doi:10.3390/jcm12093204), 2023-04-29
Supplement: s1 [file s1]

**Table S1.** Description of the sample (n=11,583)

| <b>Maternal et environmental risk or protective factors</b> |              |
|-------------------------------------------------------------|--------------|
| Perceived antenatal emotional support from partner          | n (%)        |
| <i>Antenatal emotional support from spouse</i>              |              |
| Very good support                                           | 6,155 (53.1) |
| Good support                                                | 4,543 (39.2) |
| Little support                                              | 776 (6.7)    |
| No support                                                  | 109 (0.9)    |
| <i>Quarrels with or without insults within the couple</i>   |              |
| Never                                                       | 2,184 (18.9) |
| Rarely                                                      | 4,741 (40.9) |
| Sometimes without insults                                   | 2,606 (22.5) |
| Sometimes with insults                                      | 2,052 (17.7) |
| Perceived postnatal instrumental support                    | n (%)        |
| <i>For baby's care</i>                                      |              |
| Changing diapers                                            |              |
| Mainly the mother                                           | 8,918 (77.0) |
| Mainly the father                                           | 65 (0.6)     |
| Equal division of the labour                                | 2,566 (22.2) |
| Another person                                              | 34 (0.3)     |
| Not concerned                                               | 0 (0)        |
| Feeding                                                     |              |
| Mainly the mother                                           | 9,180 (79.3) |
| Mainly the father                                           | 37 (0.3)     |
| Equal division of the labour                                | 2,215 (19.1) |
| Another person                                              | 32 (0.3)     |
| Not concerned                                               | 119 (1.0)    |
| Wash                                                        |              |
| Mainly the mother                                           | 7,553 (65.2) |
| Mainly the father                                           | 829 (7.2)    |
| Equal division of the labour                                | 3,187 (27.5) |
| Another person                                              | 14 (0.1)     |
| Not concerned                                               | 0 (0)        |
| Put it to sleep                                             |              |
| Mainly the mother                                           | 6,266 (54.1) |
| Mainly the father                                           | 466 (4.0)    |
| Equal division of the labour                                | 4,842 (41.8) |
| Another person                                              | 8 (0.1)      |
| Not concerned                                               | 1 (0.0)      |
| Taking it for a walk                                        |              |
| Mainly the mother                                           | 6,389 (55.2) |
| Mainly the father                                           | 94 (0.8)     |
| Equal division of the labour                                | 4,975 (43.0) |
| Another person                                              | 48 (0.4)     |
| Not concerned                                               | 77 (0.7)     |

|                                          |              |
|------------------------------------------|--------------|
| Getting up in the night because of cries |              |
| Mainly the mother                        | 8,283 (71.5) |
| Mainly the father                        | 367 (3.2)    |
| Equal division of the labour             | 2,748 (23.7) |
| Another person                           | 3 (0.0)      |
| Not concerned                            | 182 (1.6)    |
| Taking it to the doctor                  |              |
| Mainly the mother                        | 7,457 (64.4) |
| Mainly the father                        | 60 (0.5)     |
| Equal division of the labour             | 4,051 (35.0) |
| Another person                           | 1 (0.0)      |
| Not concerned                            | 14 (0.1)     |
| <i>For household chores</i>              |              |
| Washing dishes                           |              |
| Mainly the mother                        | 4,608 (39.8) |
| Mainly the father                        | 1,437 (12.4) |
| Equal division of the labour             | 5,396 (46.6) |
| Another person                           | 140 (1.2)    |
| Not concerned                            | 2 (0.0)      |
| Doing shopping                           |              |
| Mainly the mother                        | 4,580 (39.5) |
| Mainly the father                        | 2,312 (20.0) |
| Equal division of the labour             | 4,627 (39.9) |
| Another person                           | 51 (0.4)     |
| Not concerned                            | 13 (0.1)     |
| Preparing meals                          |              |
| Mainly the mother                        | 6,762 (58.4) |
| Mainly the father                        | 1,607 (13.9) |
| Equal division of the labour             | 3,152 (27.2) |
| Another person                           | 61 (0.5)     |
| Not concerned                            | 1 (0.0)      |
| Doing laundry                            |              |
| Mainly the mother                        | 9,593 (82.8) |
| Mainly the father                        | 377 (3.3)    |
| Equal division of the labour             | 1,513 (13.1) |
| Another person                           | 99 (0.9)     |
| Not concerned                            | 1 (0.0)      |
| Doing the housework                      |              |
| Mainly the mother                        | 6,280 (54.2) |
| Mainly the father                        | 646 (5.6)    |
| Equal division of the labour             | 3,795 (32.8) |
| Another person                           | 853 (7.4)    |
| Not concerned                            | 9 (0.1)      |
| Repairs                                  |              |
| Mainly the mother                        | 488 (4.2)    |
| Mainly the father                        | 8,967 (77.4) |

|                                                                                |               |
|--------------------------------------------------------------------------------|---------------|
| Equal division of the labour                                                   | 1,328 (11.5)  |
| Another person                                                                 | 578 (5.0)     |
| Not concerned                                                                  | 222 (1.9)     |
| Maternal antenatal preventive measures                                         | n (%)         |
| <i>Attending early prenatal interview, attending antenatal classes</i>         |               |
| Attending the two                                                              | 3,400 (29.4)  |
| Attending one                                                                  | 4,675 (40.4)  |
| Attending none                                                                 | 3,508 (30.3)  |
| Obstetrical complications                                                      | n (%)         |
| <i>Complications during pregnancy</i>                                          |               |
| None                                                                           | 4,964 (42.9)  |
| Level 3                                                                        | 4,438 (38.3)  |
| Level 4                                                                        | 2,148 (18.5)  |
| Level 5 or 6                                                                   | 33 (0.3)      |
| <i>Complications at birth or neonatal complications</i>                        |               |
| None                                                                           | 1,452 (12.5)  |
| Level 3                                                                        | 7,122 (61.5)  |
| Level 4                                                                        | 1,653 (14.3)  |
| Level 5 or 6                                                                   | 1,356 (11.7)  |
| Psychological factors                                                          | n (%)         |
| <i>Reaction about the current pregnancy</i>                                    |               |
| Happy that it happened now                                                     | 8,923 (77.0)  |
| Ambivalent towards this pregnancy                                              | 2,480 (21.4)  |
| Unwanted pregnancy                                                             | 180 (1.6)     |
| <b>Maternal et environmental risk or protective factors</b>                    |               |
| Psychological factors                                                          | n (%)         |
| <i>Experience of pregnancy</i>                                                 |               |
| Pleasant                                                                       | 4,155 (35.9)  |
| Pleasant with some difficulties                                                | 5,704 (49.2)  |
| Difficult                                                                      | 1,724 (14.9)  |
| <i>Desire of pregnancy</i>                                                     |               |
| Yes                                                                            | 10,992 (94.9) |
| With hesitations                                                               | 53 (0.5)      |
| No                                                                             | 538 (4.6)     |
| <i>Prenatal psychological distress</i>                                         |               |
| Yes                                                                            | 1,361 (11.8)  |
| No                                                                             | 10,222 (88.3) |
| <b>Infant characteristics and environmental factors specific to parenthood</b> |               |
| Early maternal parenting behavior                                              | n (%)         |
| <i>Maternal ability to understand infant's cry</i>                             |               |
| Rarely                                                                         | 139 (1.2)     |
| Sometimes                                                                      | 987 (8.5)     |
| Often                                                                          | 10,457 (90.3) |
| <i>Respect of infant's feeding rhythm</i>                                      |               |

|                                                                                                   |               |
|---------------------------------------------------------------------------------------------------|---------------|
| Wakes him to feed                                                                                 | 277 (2.4)     |
| Requests him at regular time but only if baby is awake                                            | 2,363 (20.4)  |
| Feeds him on demand                                                                               | 8,943 (77.2)  |
| <i>Mother's reaction if baby eats little or don't finish his bottle (without illness context)</i> |               |
| Insists to feed him                                                                               | 1,103 (9.5)   |
| Proposes him later                                                                                | 2,477 (21.4)  |
| Don't insist or it never happens                                                                  | 8,003 (69.1)  |
| <hr/> Infants' physical health <hr/>                                                              |               |
| <i>Infants' condition evaluated by the mother</i>                                                 |               |
| Healthy                                                                                           | 10,054 (86.8) |
| Rather healthy                                                                                    | 1,431 (12.4)  |
| Rather poor health or poor health                                                                 | 98 (0.8)      |
| <i>Infant hospitalization since returning from maternity hospital stay</i>                        |               |
| Yes                                                                                               | 672 (5.8)     |
| No                                                                                                | 10,911 (94.2) |
| <hr/>                                                                                             |               |
| <b>Infant risk or protective factors</b>                                                          |               |
| <hr/>                                                                                             |               |
| Infants' self-regulation skills                                                                   | n (%)         |
| <hr/>                                                                                             |               |
| <i>Self-appeasement</i>                                                                           |               |
| Never or almost never                                                                             | 1,234 (10.7)  |
| Often only                                                                                        | 3,780 (32.6)  |
| Only if parents remain with him                                                                   | 1,199 (10.4)  |
| Only if parents take him in arms                                                                  | 5,370 (46.4)  |
| <i>Frequency of crying</i>                                                                        |               |
| Rarely                                                                                            | 7,629 (65.9)  |
| Often                                                                                             | 3,421 (29.5)  |
| Very often                                                                                        | 533 (4.6)     |
| <i>Nocturnal awakenings</i>                                                                       |               |
| Never or almost never                                                                             | 3,948 (34.1)  |
| Sometimes or often                                                                                | 2,041 (17.6)  |
| All nights or almost                                                                              | 5,594 (48.3)  |

**Table S2.** Characteristics of women with missing data (n=6,722)

| <b>Maternal and environmental vulnerability factors</b>                                                                                  |              |
|------------------------------------------------------------------------------------------------------------------------------------------|--------------|
| Socio-demographic and economic variables                                                                                                 | n (%)        |
| <i>Mother's age</i>                                                                                                                      |              |
| 18-24                                                                                                                                    | 1333 (19.8)  |
| 25-34                                                                                                                                    | 3895 (57.9)  |
| ≥ 35 years                                                                                                                               | 1299 (19.3)  |
| Missing                                                                                                                                  | 195 (2.9)    |
| <i>Nationality</i>                                                                                                                       |              |
| French                                                                                                                                   | 5120 (76.2)  |
| French by naturalisation                                                                                                                 | 342 (5.1)    |
| Foreigner                                                                                                                                | 960 (14.3)   |
| Missing                                                                                                                                  | 300 (4.5)    |
| <i>Educational level</i>                                                                                                                 |              |
| < 9                                                                                                                                      | 1,988 (29.6) |
| 9-11                                                                                                                                     | 1,711 (25.5) |
| ≥ 12 years                                                                                                                               | 2,833 (42.1) |
| Missing                                                                                                                                  | 190 (2.8)    |
| <i>Mother's employment status during pregnancy</i>                                                                                       |              |
| Employed or student                                                                                                                      | 4,096 (60.9) |
| Housewife, on parental leave or retired                                                                                                  | 492 (7.3)    |
| Unemployed                                                                                                                               | 1,138 (16.9) |
| Missing                                                                                                                                  | 996 (14.8)   |
| <i>Number of children</i>                                                                                                                |              |
| 1                                                                                                                                        | 3,022 (45.0) |
| 2                                                                                                                                        | 1,993 (29.6) |
| 3 or more                                                                                                                                | 1,426 (21.2) |
| Missing                                                                                                                                  | 281 (4.2)    |
| <i>Familial financial status</i>                                                                                                         |              |
| High and middle                                                                                                                          | 2,104 (31.3) |
| Low                                                                                                                                      | 1,773 (26.4) |
| Very low                                                                                                                                 | 646 (9.6)    |
| Missing                                                                                                                                  | 2,199 (32.7) |
| Psychiatric history                                                                                                                      | n (%)        |
| <i>Consultation with a mental health specialist before pregnancy<br/>(psychiatrist, psychologist, psychotherapist or another doctor)</i> |              |
| Yes                                                                                                                                      | 603 (9.0)    |
| No                                                                                                                                       | 1,820 (27.1) |
| Missing                                                                                                                                  | 4,299 (64.0) |
| <i>Depression during a previous pregnancy</i>                                                                                            |              |
| Yes                                                                                                                                      | 447 (6.6)    |
| No                                                                                                                                       | 5,907 (87.9) |
| Missing                                                                                                                                  | 368 (5.5)    |

**Table S3.** Socio-demographic and economic variables correlation matrix

|                                                    | <b>Mother's age</b> | <b>Nationality</b> | <b>Educational level</b> | <b>Mother's employment status during pregnancy</b> | <b>Familial financial status</b> | <b>Number of children</b> |
|----------------------------------------------------|---------------------|--------------------|--------------------------|----------------------------------------------------|----------------------------------|---------------------------|
| <b>Mother's age</b>                                | 1.00                | 0.04               | -0.22                    | 0.09                                               | -0.05                            | 0.31                      |
| <b>Nationality</b>                                 |                     | 1.00               | 0.02                     | 0.12                                               | 0.05                             | 0.02                      |
| <b>Educational level</b>                           |                     |                    | 1.00                     | 0.25                                               | 0.25                             | 0.13                      |
| <b>Mother's employment status during pregnancy</b> |                     |                    |                          | 1.00                                               | 0.14                             | 0.13                      |
| <b>Familial financial status</b>                   |                     |                    |                          |                                                    | 1.00                             | 0.11                      |
| <b>Number of children</b>                          |                     |                    |                          |                                                    |                                  | 1.00                      |

KMO = 0.52

**Table S4.** Perceived antenatal emotional support from partner correlation matrix

|                                                | <b>Antenatal emotional support from spouse</b> | <b>Quarrels with or without insults</b> |
|------------------------------------------------|------------------------------------------------|-----------------------------------------|
| <b>Antenatal emotional support from spouse</b> | 1.00                                           | 0.31                                    |
| <b>Quarrels with or without insults</b>        |                                                | 1.00                                    |

**Table S5.** Eigenvalues of Perceived antenatal emotional support from partner correlation matrix

|   | <b>Eigenvalues</b> | <b>Difference</b> | <b>Variance explained</b> | <b>Cumulative</b> |
|---|--------------------|-------------------|---------------------------|-------------------|
| 1 | 1.31               | 0.62              | 0.65                      | 0.65              |
| 2 | 0.69               |                   | 0.35                      | 1.00              |

**Table S6.** Factor solution of Perceived antenatal emotional support from partner correlation matrix

| <b>Représentation du facteur</b>               |                 |
|------------------------------------------------|-----------------|
|                                                | <b>Factor 1</b> |
| <b>Antenatal emotional support from spouse</b> | 0.81            |
| <b>Quarrels with or without insults</b>        | 0.81            |

**Table S7.** Perceived postnatal instrumental support correlation matrix

|                            | Changing<br>diapers | Feeding | Put to<br>bed | Wash | Taking<br>for a<br>walk | Getting<br>up in the<br>night | Taking<br>it to the<br>doctor | Washing<br>dishes | Doing<br>shopping | Prepa<br>ring<br>meals | Doing<br>laundry | Doing the<br>housework | Repairs |
|----------------------------|---------------------|---------|---------------|------|-------------------------|-------------------------------|-------------------------------|-------------------|-------------------|------------------------|------------------|------------------------|---------|
| Changing<br>diapers        | 1.00                | 0.48    | 0.29          | 0.27 | 0.28                    | 0.26                          | 0.20                          | 0.12              | 0.06              | 0.09                   | 0.11             | 0.10                   | 0.01    |
| Feeding                    |                     | 1.00    | 0.27          | 0.11 | 0.27                    | 0.28                          | 0.18                          | 0.05              | -0.001            | 0.05                   | 0.05             | 0.02                   | -0.002  |
| Put to bed                 |                     |         | 1.00          | 0.29 | 0.19                    | 0.30                          | 0.15                          | 0.10              | 0.04              | 0.06                   | 0.07             | 0.07                   | 0.01    |
| Wash                       |                     |         |               | 1.00 | 0.12                    | 0.12                          | 0.16                          | 0.09              | 0.07              | 0.09                   | 0.08             | 0.12                   | 0.02    |
| Taking for<br>a walk       |                     |         |               |      | 1.00                    | 0.16                          | 0.25                          | 0.06              | 0.12              | 0.10                   | 0.08             | 0.04                   | 0.01    |
| Getting up<br>in the night |                     |         |               |      |                         | 1.00                          | 0.14                          | 0.09              | 0.01              | 0.05                   | 0.07             | 0.06                   | -0.002  |
| Taking it to<br>the doctor |                     |         |               |      |                         |                               | 1.00                          | 0.04              | 0.19              | 0.08                   | 0.08             | 0.03                   | 0.02    |
| Washing<br>dishes          |                     |         |               |      |                         |                               |                               | 1.00              | 0.13              | 0.21                   | 0.23             | 0.27                   | 0.02    |
| Doing<br>shopping          |                     |         |               |      |                         |                               |                               |                   | 1.00              | 0.25                   | 0.14             | 0.10                   | 0.03    |
| Preparing<br>meals         |                     |         |               |      |                         |                               |                               |                   |                   | 1.00                   | 0.10             | 0.11                   | 0.02    |
| Doing<br>laundry           |                     |         |               |      |                         |                               |                               |                   |                   |                        | 1.00             | 0.20                   | 0.04    |
| Doing the<br>housework     |                     |         |               |      |                         |                               |                               |                   |                   |                        |                  | 1.00                   | 0.05    |
| Repairs                    |                     |         |               |      |                         |                               |                               |                   |                   |                        |                  |                        | 1.00    |

KMO = 0.74

**Table S8.** Eigenvalues of Perceived postnatal instrumental support correlation matrix

|           | Eigenvalues | Difference | Variance Explained | Cumulative |
|-----------|-------------|------------|--------------------|------------|
| <b>1</b>  | <b>2.60</b> | 1.05       | <b>0.19</b>        | 0.19       |
| <b>2</b>  | <b>1.55</b> | 0.41       | <b>0.11</b>        | 0.30       |
| <b>3</b>  | 1.14        | 0.11       | 0.08               | 0.38       |
| <b>4</b>  | 1.03        | 0.05       | 0.07               | 0.45       |
| <b>5</b>  | 0.98        | 0.03       | 0.07               | 0.52       |
| <b>6</b>  | 0.95        | 0.05       | 0.07               | 0.59       |
| <b>7</b>  | 0.90        | 0.07       | 0.06               | 0.65       |
| <b>8</b>  | 0.83        | 0.05       | 0.06               | 0.71       |
| <b>9</b>  | 0.78        | 0.05       | 0.06               | 0.77       |
| <b>10</b> | 0.73        | 0.02       | 0.05               | 0.82       |
| <b>11</b> | 0.71        | 0.03       | 0.05               | 0.87       |
| <b>12</b> | 0.68        | 0.05       | 0.05               | 0.92       |
| <b>13</b> | 0.63        | 0.15       | 0.05               | 0.97       |
| <b>14</b> | 0.48        |            | 0.03               | 1.00       |

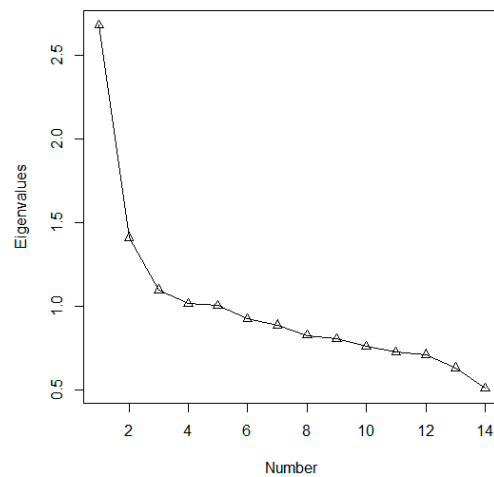**Figure S1.** Graphic representation of the eigenvalues of Perceived postnatal instrumental support**Table S9.** Factor solution of Perceived postnatal instrumental support after Varimax rotation

|                                | Factor 1 | Factor 2    |
|--------------------------------|----------|-------------|
| <b>Changing diapers</b>        | 0.73     | 0.05        |
| <b>Feeding</b>                 | 0.70     | -0.12       |
| <b>Put to bed</b>              | 0.61     | 0.03        |
| <b>Wash</b>                    | 0.44     | 0.18        |
| <b>Taking for a walk</b>       | 0.54     | 0.08        |
| <b>Getting up in the night</b> | 0.57     | -0.02       |
| <b>Taking it to the doctor</b> | 0.43     | 0.15        |
| <b>Wash</b>                    | 0.11     | <b>0.63</b> |
| <b>Doing shopping</b>          | 0.06     | 0.54        |
| <b>Preparing meals</b>         | 0.10     | 0.54        |
| <b>Doing laundry</b>           | 0.10     | 0.54        |
| <b>Doing the housework</b>     | 0.06     | <b>0.58</b> |
| <b>Repairs</b>                 | -0.01    | 0.15        |



**Table S10.** Obstetrical complications correlation matrix

|                                                  | Complications during Pregnancy | Complications at Birth Or Neonatal Complications |
|--------------------------------------------------|--------------------------------|--------------------------------------------------|
| Complications during pregnancy                   | 1.00                           | 0.11                                             |
| Complications at birth or neonatal complications |                                | 1.00                                             |

**Table S11.** Psychological factors correlation matrix

|                                      | Desire of Pregnancy | Reaction about the Current Pregnancy | Experience of Pregnancy |
|--------------------------------------|---------------------|--------------------------------------|-------------------------|
| Desire of pregnancy                  | 1.00                | 0.23                                 | 0.07                    |
| Reaction about the current pregnancy |                     | 1.00                                 | 0.09                    |
| Experience of pregnancy              |                     |                                      | 1.00                    |

KMO =0.53

**Table S12.** Early maternal parenting behaviour correlation matrix

|                                                                  | Sing songs | Talk o the child | Maternal ability to understand infant's cries | Respect of infant's feeding rhythm | Mother's reaction if baby eats little or don't finish his bottle |
|------------------------------------------------------------------|------------|------------------|-----------------------------------------------|------------------------------------|------------------------------------------------------------------|
| Sing songs                                                       | 1,00       | 0,08             | 0,02                                          | 0,03                               | 0,01                                                             |
| Talk o the child                                                 |            | 1,00             | 0,03                                          | -0,00                              | 0,02                                                             |
| Maternal ability to understand infant's cries                    |            |                  | 1,00                                          | 0,01                               | 0,03                                                             |
| Respect of infant's feeding rhythm                               |            |                  |                                               | 1,00                               | 0,08                                                             |
| Mother's reaction if baby eats little or don't finish his bottle |            |                  |                                               |                                    | 1,00                                                             |

KMO =0.52

**Table S13.** Infant's physical health matrix correlation

|                                                                  | Infant's condition evaluated by the mother | Infant's hospitalisation since returning from maternity hospital |
|------------------------------------------------------------------|--------------------------------------------|------------------------------------------------------------------|
| Infant's condition evaluated by the mother                       | 1.00                                       | 0.26                                                             |
| Infant's hospitalisation since returning from maternity hospital |                                            | 1.00                                                             |

**Table S14.** Infants' self-regulation skills correlation matrix

|                      | Self-Appeasement | Frequency of Crying | Nocturnal Awakenings |
|----------------------|------------------|---------------------|----------------------|
| Self-appeasement     | 1.00             | 0.29                | 0.18                 |
| Frequency of crying  |                  | 1.00                | 0.18                 |
| Nocturnal awakenings |                  |                     | 1.00                 |

KMO = 0.57

**Table S15.** Eigen values of Self-regulation skills correlation matrix

|   | Eigen values | Difference | Variance Explicated | Cumulative |
|---|--------------|------------|---------------------|------------|
| 1 | 1.50         | 0.36       | 0.25                | 0.25       |
| 2 | 1.14         | 0.12       | 0.19                | 0.44       |
| 3 | 1.02         | 0.16       | 0.16                | 0.61       |
| 4 | 0.86         | 0.05       | 0.14                | 0.75       |
| 5 | 0.80         | 0.11       | 0.13                | 0.89       |
| 6 | 0.69         |            | 0.11                | 1.00       |

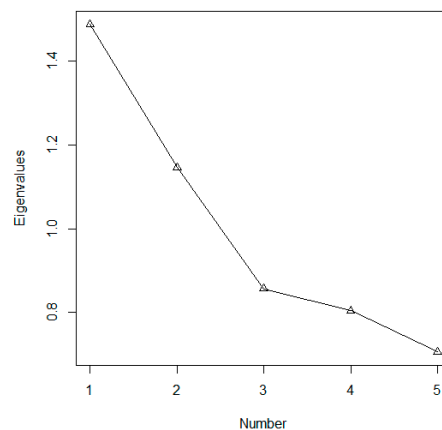**Figure S2.** Graphic representation of the eigen values of Self-regulation skills**Table S16.** Factor solution of Self-regulation skills

|                      | Facteur 1 |
|----------------------|-----------|
| Self-appaisement     | 0,68      |
| Frequency of crying  | 0,66      |
| Nocturnal awakenings | 0,60      |
